# Supplementary material
Source: PubMed Central journal article supplement (PMC2868370)

# Supplementary Figure 1

← Hematoxylin →

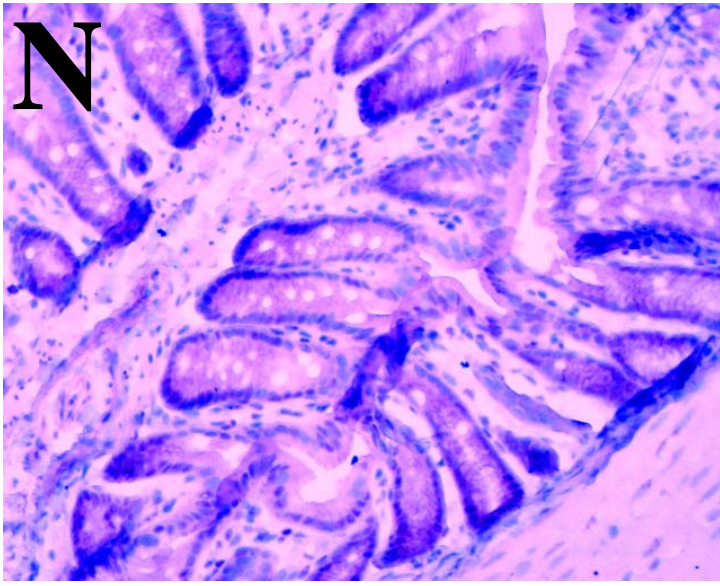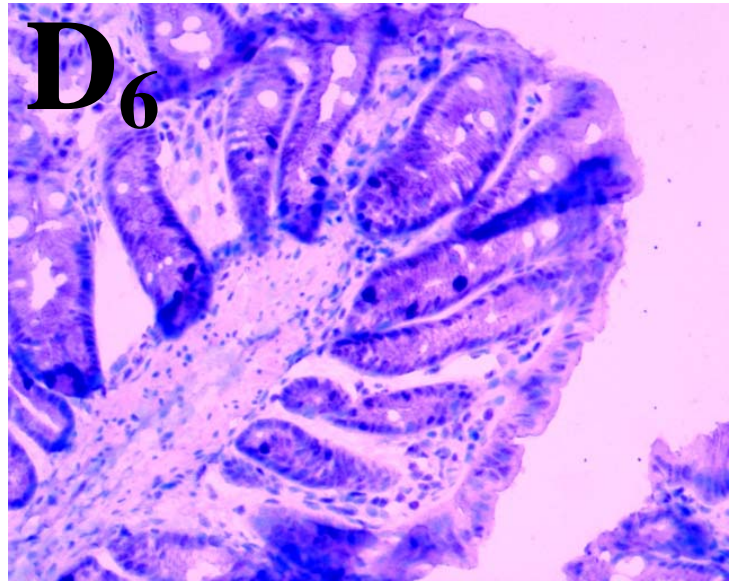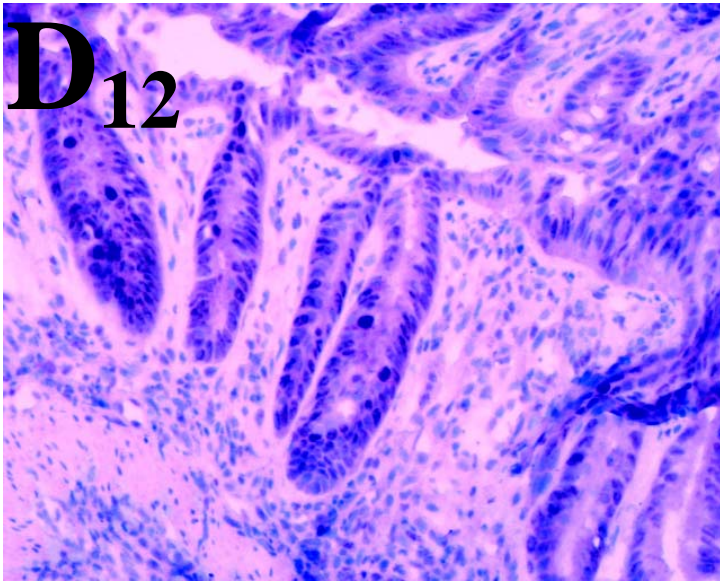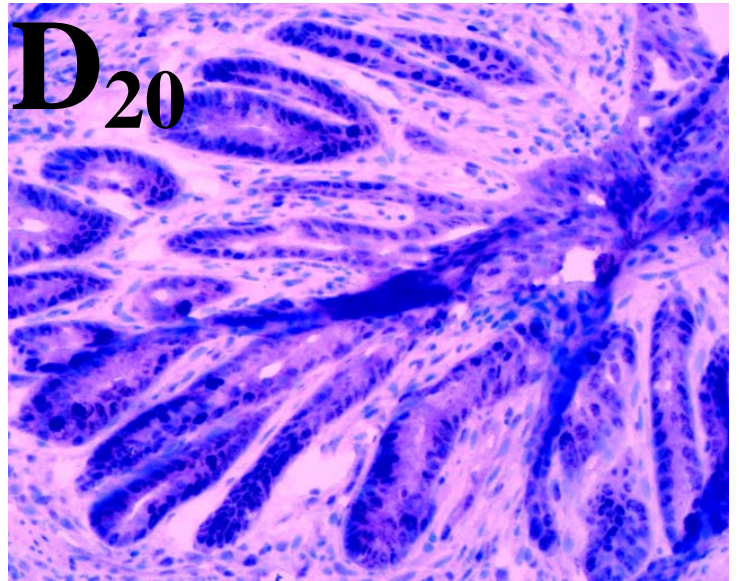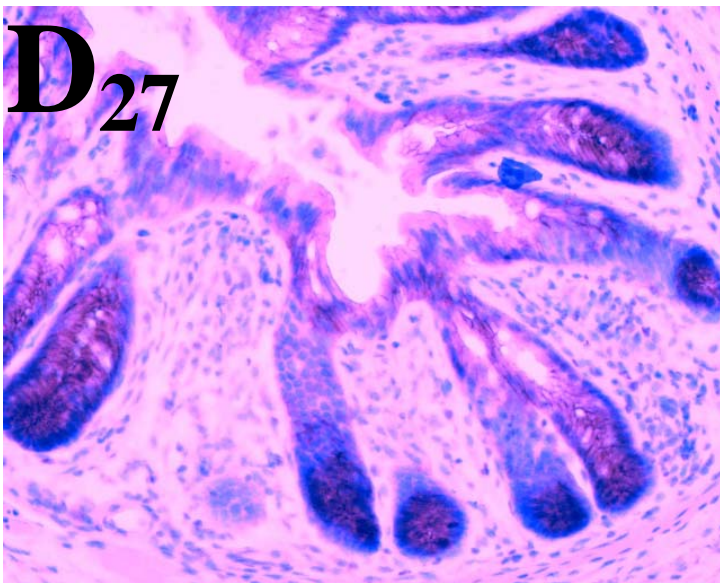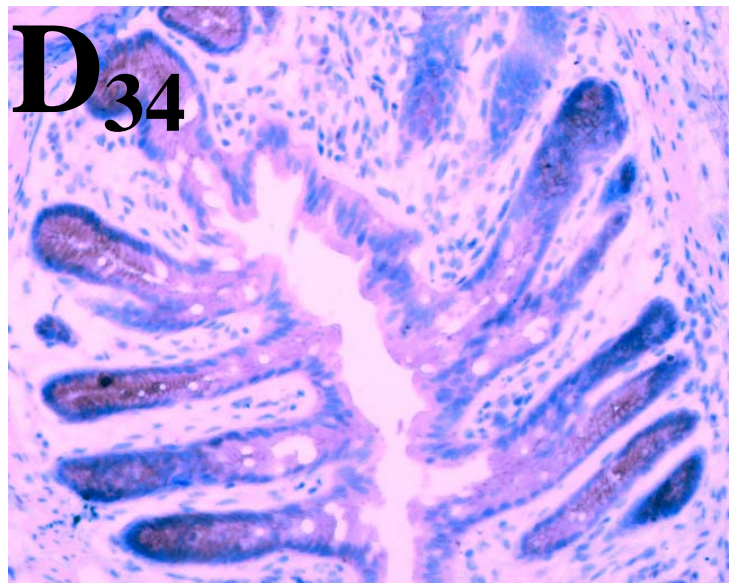

20X

Supplement: NIHMS87083-supplement-01.pdf [file NIHMS87083-supplement-01.pdf]

# Supplementary Figure 2

← Counterstain →

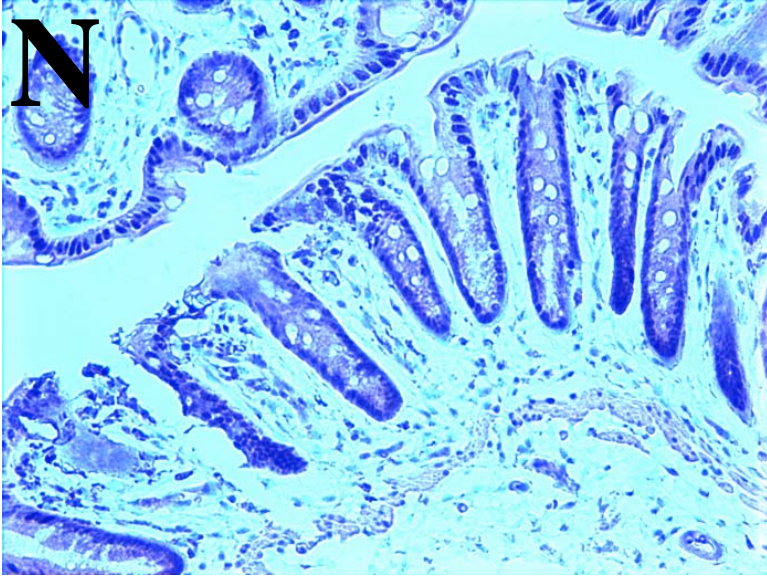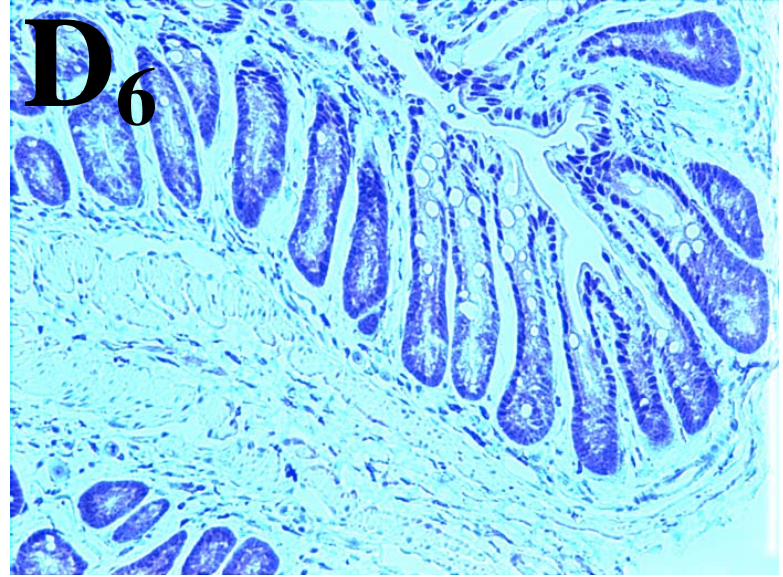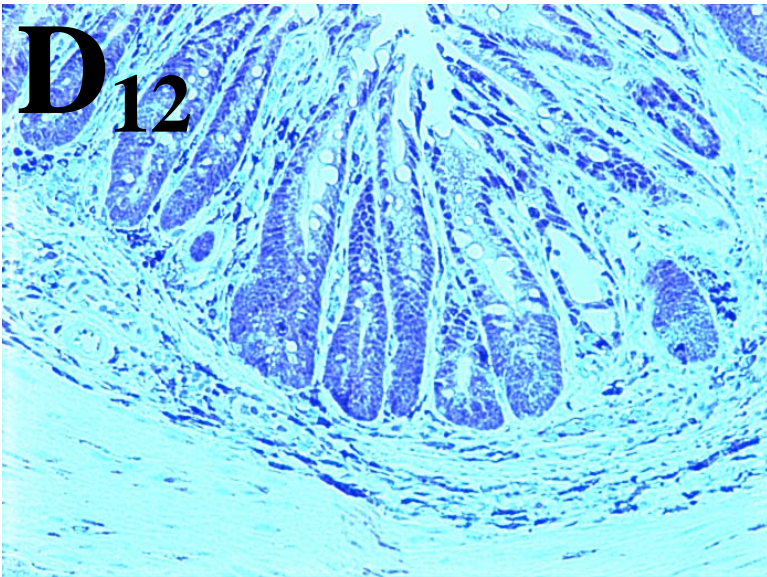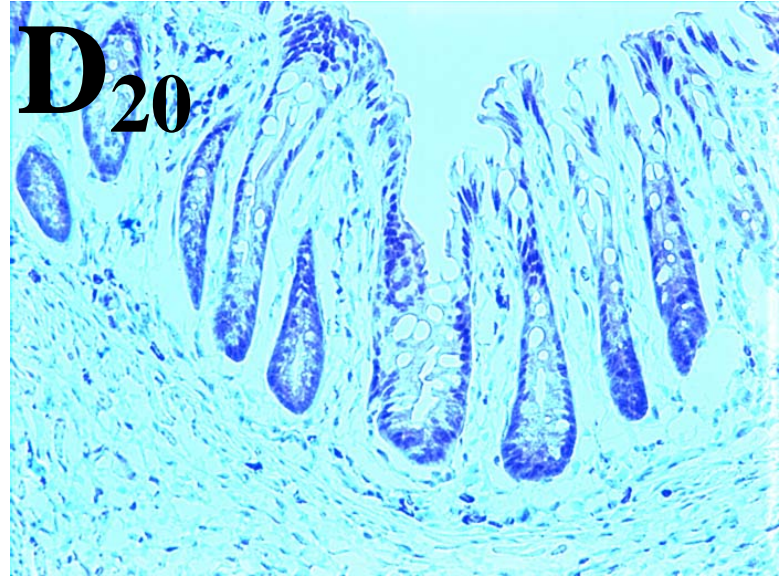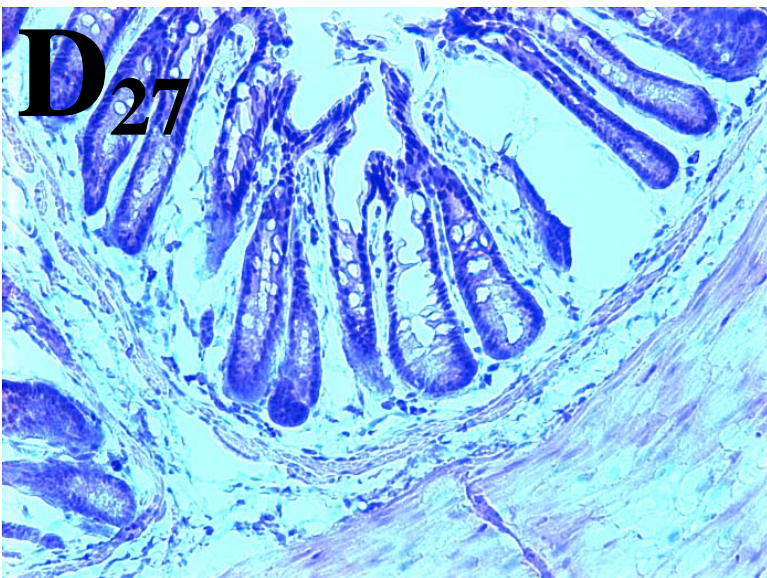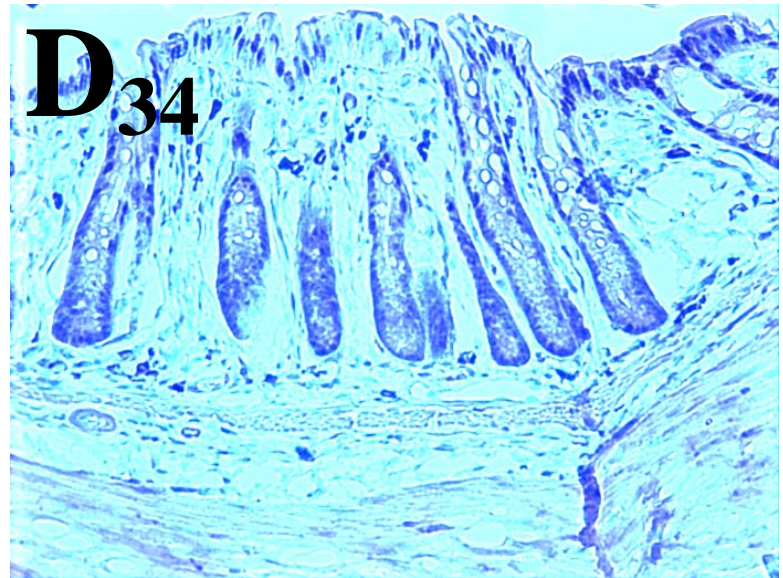

**20X**

Supplement: NIHMS87083-supplement-02.pdf [file NIHMS87083-supplement-02.pdf]
